# Supplementary material
Source: PubMed Central journal article supplement (PMC8661138)
Supplement: ajtr0013-12704-f6.pdf [file ajtr0013-12704-f6.pdf]

## A predictive model for NAFLD

**Supplementary Table 1.** All the clinical characteristics of subjects with and without NAFLD in the training cohort

| Characters                 | NAFLD N=53    | No NAFLD N=45 | P value |
|----------------------------|---------------|---------------|---------|
| Gender (male/female, n)    | 32/21         | 25/20         | 0.02    |
| ALT (U/L)                  | 31.21±21.54   | 19.30±12.93   | <0.001  |
| AST (U/L)                  | 22.24±4.61    | 20.73±12.83   | 0.27    |
| ALT to AST                 | 1.33±0.64     | 0.90±0.29     | <0.001  |
| GGT (U/L)                  | 35.88±29.93   | 21.95±13.96   | 0.02    |
| AFU (U/L)                  | 26.45±7.91    | 23.32±7.12    | 0.046   |
| WBC (× 10 <sup>9</sup> /L) | 6.40±1.70     | 5.30±1.31     | <0.001  |
| TG (mmol/L)                | 1.83±1.26     | 1.25±0.53     | <0.001  |
| Hb (g/L)                   | 144.98±11.69  | 138.22±15.76  | 0.03    |
| NEUT (10 <sup>9</sup> /L)  | 3.40±1.11     | 2.90±0.94     | 0.02    |
| NEUT%                      | 52.55±8.96    | 53.13±7.82    | 0.74    |
| LYM (10 <sup>9</sup> /L)   | 2.78±2.52     | 2.00±0.62     | 0.03    |
| LYM%                       | 37.13±9.28    | 37.17±8.60    | 0.98    |
| MON (10 <sup>9</sup> /L)   | 0.40±0.12     | 0.34±0.12     | 0.02    |
| MON%                       | 6.37±1.62     | 6.46±1.65     | 0.78    |
| EOS (10 <sup>9</sup> /L)   | 0.16±0.10     | 0.15±0.11     | 0.78    |
| EOS%                       | 2.49±1.59     | 2.77±1.59     | 0.39    |
| BASO (10 <sup>9</sup> /L)  | 0.04±0.02     | 0.03±0.02     | 0.04    |
| BASO%                      | 0.57±0.26     | 0.55±0.30     | 0.75    |
| RBC (10 <sup>12</sup> /L)  | 4.63±0.46     | 4.47±0.43     | 0.09    |
| HCT (%)                    | 43.12±3.60    | 41.56±4.08    | 0.05    |
| MCV (fL)                   | 92.55±4.07    | 93.16±5.07    | 0.52    |
| MCH (pg)                   | 31.07±1.53    | 31.09±2.00    | 0.96    |
| MCHC (g/L)                 | 333.40±17.47  | 333.73±11.43  | 0.91    |
| RDW (fL)                   | 42.71±5.39    | 44.18±3.56    | 0.12    |
| RDW (%)                    | 12.56±0.53    | 12.79±1.23    | 0.24    |
| PLT (fL)                   | 229.98±51.26  | 224.73±50.05  | 0.62    |
| PCT (%)                    | 0.22±0.05     | 0.23±0.09     | 0.74    |
| MPV (fL)                   | 9.58±1.13     | 9.62±1.13     | 0.89    |
| P-LCR%                     | 27.46±6.16    | 27.81±7.04    | 0.80    |
| PDW (%)                    | 13.99±2.13    | 14.10±2.37    | 0.81    |
| TP (g/L)                   | 71.75±6.31    | 71.14±10.90   | 0.74    |
| ALB (g/L)                  | 43.50±3.50    | 43.43±3.42    | 0.93    |
| GLOB (g/L)                 | 28.43±4.77    | 29.27±4.88    | 0.41    |
| A/G                        | 1.58±0.29     | 1.54±0.27     | 0.48    |
| TB (μmol/L)                | 13.31±3.85    | 13.20±4.36    | 0.90    |
| DB (μmol/L)                | 2.23±0.78     | 2.16±0.69     | 0.67    |
| IB (μmol/L)                | 11.08±3.25    | 11.10±3.86    | 0.97    |
| ALP (U/L)                  | 78.94±19.56   | 73.03±21.74   | 0.18    |
| TBA (μmol/L)               | 4.89±3.08     | 5.23±4.17     | 0.66    |
| GLU (mmol/L)               | 5.00±0.80     | 4.80±0.86     | 0.27    |
| BUN (mmol/L)               | 5.45±1.53     | 5.10±1.02     | 0.20    |
| CRE (μmol/L)               | 68.38±13.98   | 74.01±49.60   | 0.47    |
| BUN/CRE                    | 0.08±0.02     | 0.08±0.02     | 0.82    |
| UA (μmol/L)                | 360.34±86.08  | 312.26±70.99  | 0.00    |
| CK (U/L)                   | 118.83±116.29 | 96.49±83.32   | 0.31    |

## A predictive model for NAFLD

|                |              |              |      |
|----------------|--------------|--------------|------|
| CK-MB (U/L)    | 15.30±12.95  | 14.63±7.09   | 0.77 |
| LDH (mmol/L)   | 178.06±27.60 | 170.05±34.31 | 0.24 |
| HBDH (U/L)     | 121.39±18.69 | 119.26±25.10 | 0.66 |
| TC (mmol/L)    | 5.32±1.01    | 5.11±1.08    | 0.35 |
| HDL (mmol/L)   | 1.24±0.28    | 1.39±0.31    | 0.02 |
| LDL (mmol/L)   | 3.19±0.72    | 3.05±0.80    | 0.39 |
| APO A1 (g/L)   | 1.53±0.52    | 1.45±0.30    | 0.41 |
| APO B (g/L)    | 1.01±0.46    | 0.98±0.26    | 0.26 |
| APO A1/APO B   | 1.35±0.39    | 1.62±0.70    | 0.04 |
| LP (a) (mg/dL) | 18.80±17.30  | 23.60±22.82  | 0.29 |

**Supplementary Table 2.** All the clinical characteristics of subjects with and without NAFLD in the validation cohort

| Characters                 | NAFLD group N=81 | Control group N=87 | P value |
|----------------------------|------------------|--------------------|---------|
| ALT (U/L)                  | 31.45±19.24      | 23.27±15.86        | <0.001  |
| AST (U/L)                  | 21.82±8.52       | 19.22±6.69         | 0.03    |
| ALT to AST                 | 1.41±0.44        | 1.16±0.52          | <0.001  |
| GGT (U/L)                  | 33.78±14.53      | 18.20±6.47         | 0.02    |
| AFU (U/L)                  | 29.35±7.88       | 26.31±7.05         | 0.022   |
| WBC (× 10 <sup>9</sup> /L) | 6.46±1.69        | 5.80±1.25          | 0.012   |
| TG (mmol/L)                | 2.03±1.89        | 1.39±1.14          | 0.022   |
| Hb (g/L)                   | 143.54±14.10     | 138.80±17.20       | 0.08    |
| LYM (10 <sup>9</sup> /L)   | 2.19±0.75        | 1.91±0.59          | 0.01    |
| MON (10 <sup>9</sup> /L)   | 0.46±0.15        | 0.37±0.13          | <0.001  |
| MON%                       | 7.32±2.02        | 6.42±2.02          | <0.001  |
| BASO%                      | 0.53±0.25        | 0.44±0.28          | 0.04    |
| RDW (%)                    | 12.37±0.55       | 22.65±13.79        | <0.001  |
| MPV (fL)                   | 9.88±0.94        | 10.06±0.95         | 0.23    |
| P-LCR%                     | 24.42±6.47       | 25.82±7.39         | 0.20    |
| PDW (%)                    | 12.78±2.31       | 13.14±2.58         | 0.30    |
| TP (g/L)                   | 69.34±5.47       | 69.85±5.15         | 0.55    |
| ALB (g/L)                  | 43.14±3.83       | 42.96±3.59         | 0.77    |
| GLOB (g/L)                 | 26.29±4.26       | 26.83±3.65         | 0.39    |
| A/G                        | 1.68±0.31        | 1.64±0.28          | 0.30    |
| TB (μmol/L)                | 15.80±7.74       | 14.20±5.96         | 0.14    |
| DB (μmol/L)                | 4.27±2.04        | 4.07±1.84          | 0.51    |
| IB (μmol/L)                | 11.40±6.02       | 10.12±4.55         | 0.13    |
| ALP (U/L)                  | 63.82±17.39      | 62.49±27.33        | 0.71    |
| TBA (μmol/L)               | 4.09±3.09        | 4.22±3.71          | 0.82    |
| GLU (mmol/L)               | 5.49±1.27        | 5.00±1.27          | 0.40    |
| BUN (mmol/L)               | 5.35±1.20        | 5.13±1.24          | 0.40    |
| CRE (μmol/L)               | 76.34±18.13      | 77.37±16.35        | 0.71    |
| BUN/CRE                    | 14.58±8.35       | 14.61±7.52         | 0.98    |
| UA (μmol/L)                | 366.70±78.65     | 306.36±80.34       | 0.00    |
| CK (U/L)                   | 113.28±83.31     | 90.27±35.60        | 0.05    |
| CK-MB (U/L)                | 12.19±4.57       | 13.25±5.26         | 0.23    |
| LDH (mmol/L)               | 162.86±33.33     | 159.17±37.33       | 0.53    |
| HBDH (U/L)                 | 128.30±22.32     | 124.18±27.89       | 0.59    |
| TC (mmol/L)                | 4.54±0.54        | 4.15±1.60          | <0.001  |

## A predictive model for NAFLD

|                |             |             |        |
|----------------|-------------|-------------|--------|
| HDL (mmol/L)   | 1.33±0.30   | 1.46±0.36   | 0.04   |
| LDL (mmol/L)   | 3.21±0.75   | 2.92±0.87   | 0.07   |
| APO A1 (g/L)   | 1.38±0.24   | 1.52±0.22   | 0.01   |
| APO B (g/L)    | 1.00±0.24   | 0.85±0.19   | 0.01   |
| APO A1/APO B   | 1.48±0.51   | 1.88±0.53   | <0.001 |
| LP (a) (mg/dL) | 18.55±16.30 | 20.64±21.22 | 0.37   |

**Supplementary Table 3.** Logical regression coefficients of the candidate Biomarkers in the training cohort

| Name        | Coefficients |
|-------------|--------------|
| (Intercept) | -8.77        |
| WBC         | 0.29         |
| ALT to AST  | 2.23         |
| AFU         | 0.07         |
| Hb          | 0.01         |
| TG          | 0.72         |
| GGT         | 0.01         |

**Supplementary Table 4.** The best cutoff value for the predicted model in the training cohort

|      | Threshold | AUROC | Specificity | Sensitivity |
|------|-----------|-------|-------------|-------------|
| Best | 0.53      | 0.821 | 0.733       | 0.765       |

**Supplementary Table 5.** Characteristics of mice fed with HFD or CD

| Characters                 | HFD group N=32 | CD group N=28 | P value |
|----------------------------|----------------|---------------|---------|
| ALT (U/L)                  | 48.14±15.57    | 45.48±11.02   | 0.58    |
| AST (U/L)                  | 193.77±63.35   | 182.32±50.56  | 0.59    |
| ALT to AST                 | 0.27±0.10      | 0.26±0.06     | 0.78    |
| GGT (IU/L)                 | 6.29±0.90      | 6.14±0.60     | 0.58    |
| AFU (U/L)                  | 6.14±0.71      | 6.02±0.47     | 0.58    |
| WBC (× 10 <sup>9</sup> /L) | 9.38±1.08      | 8.98±1.05     | 0.33    |
| TG (mmol/L)                | 0.90±0.12      | 0.85±0.11     | 0.24    |
| Hb (g/L)                   | 140.07±15.99   | 129.03±20.32  | 0.11    |
